# Supplementary material for: Enhanced Stability and Bioactivity of Natural Anticancer Topoisomerase I Inhibitors through Cyclodextrin Complexation
Source: MDPI journal article supplement (doi:10.3390/pharmaceutics13101609), 2021-10-03
Supplement: s1 [file s1]

# Supplementary Materials: Enhanced stability and bioactivity of natural anticancer topoisomerase I inhibitors through cyclodextrin nanoencapsulation

Víctor González-Ruiz, Ángel Cores, Olmo Martín-Cámara, Karen Orellana, Víctor Cervera-Carrascón, Patrycja Michalska, Ana I. Olives, Rafael León, M. Antonia Martín and J. Carlos Menéndez

**Table S1.**  $^1\text{H}$ -NMR chemical shift variations obtained for the inclusion complexes CPT/ $\beta$ -CD and CPT/HP $\beta$ -CD) with regard to those observed for the free drug in  $d_6$ -DMSO. The variations correspond to the changes in the signals of the guest molecule.

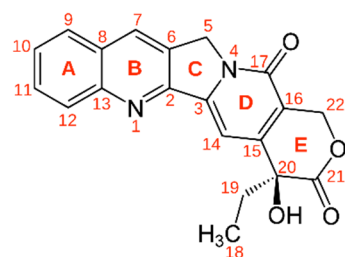

| H-SIGNAL | CPT/ $\beta$ -CD complex       |                                  | CPT/HP $\beta$ -CD complex     |                                  |
|----------|--------------------------------|----------------------------------|--------------------------------|----------------------------------|
|          | $\Delta\delta$ (absolute, ppm) | $\Delta\delta$ (normalized, ppm) | $\Delta\delta$ (absolute, ppm) | $\Delta\delta$ (normalized, ppm) |
| H-5      | 0.017                          | 1.0                              | 0.021                          | 1.0                              |
| H-7      | 0.015                          | 0.882                            | 0.018                          | 0.857                            |
| H-9      | 0.014                          | 0.823                            | 0.017                          | 0.809                            |
| H-10     | 0.010                          | 0.588                            | 0.013                          | 0.619                            |
| H-11     | 0.009                          | 0.529                            | 0.012                          | 0.571                            |
| H-12     | 0.011                          | 0.647                            | 0.014                          | 0.667                            |
| H-14     | 0.007                          | 0.412                            | 0.010                          | 0.476                            |
| H-18     | 0.000                          | 0.000                            | 0.000                          | 0.000                            |
| H-19     | 0.001                          | 0.059                            | 0.003                          | 0.143                            |
| H-22     | 0.005                          | 0.294                            | 0.006                          | 0.286                            |

**Table S2.**  $^{13}\text{C}$ -NMR chemical shift variations obtained for the inclusion complexes CPT/ $\beta$ -CD and CPT/HP $\beta$ -CD) with regard to those observed for the free drug in  $d_6$ -DMSO.

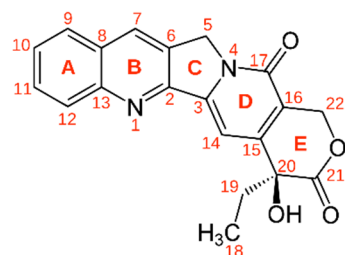

| C-SIGNAL | CPT/ $\beta$ -CD complex       |                                  | CPT/HP $\beta$ -CD complex     |                                  |
|----------|--------------------------------|----------------------------------|--------------------------------|----------------------------------|
|          | $\Delta\delta$ (absolute, ppm) | $\Delta\delta$ (normalized, ppm) | $\Delta\delta$ (absolute, ppm) | $\Delta\delta$ (normalized, ppm) |
| C-2      | 0.035                          | 0.921                            | 0.040                          | 1.0                              |
| C-3      | 0.023                          | 0.605                            | 0.027                          | 0.675                            |
| C-5      | 0.020                          | 0.526                            | 0.027                          | 0.675                            |
| C-6      | 0.020                          | 0.526                            | 0.022                          | 0.550                            |
| C-7      | 0.013                          | 0.342                            | 0.016                          | 0.400                            |
| C-8      | 0.018                          | 0.474                            | 0.025                          | 0.625                            |
| C-9      | 0.026                          | 0.684                            | 0.031                          | 0.775                            |
| C-10     | 0.015                          | 0.395                            | 0.023                          | 0.575                            |
| C-11     | 0.022                          | 0.579                            | 0.027                          | 0.675                            |
| C-12     | 0.038                          | 1.0                              | 0.023                          | 0.575                            |
| C-13     | 0.019                          | 0.500                            | 0.020                          | 0.500                            |
| C-14     | 0.008                          | 0.210                            | --                             | --                               |
| C-15     | 0.008                          | 0.210                            | 0.008                          | 0.200                            |
| C-16     | 0.015                          | 0.395                            | 0.016                          | 0.400                            |
| C-17     | 0.013                          | 0.342                            | 0.019                          | 0.475                            |
| C-18     | 0.001                          | 0.026                            | --                             | --                               |
| C-19     | 0.007                          | 0.184                            | 0.007                          | 0.175                            |
| C-20     | 0.008                          | 0.210                            | --                             | --                               |
| C-21     | --                             | --                               | --                             | --                               |
| C-22     | 0.003                          | 0.079                            | 0.004                          | 0.100                            |

**Table S3.** <sup>1</sup>H-NMR chemical shift variations obtained for the inclusion complexes Luotonin A/β-CD and Luotonin A /HPβ-CD) with regard to those observed for the free drug in d<sub>6</sub>-DMSO. The variations correspond to the changes in the signals of the guest molecule.

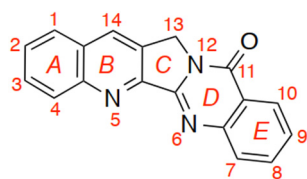

| H-SIGNAL | Luotonin A/β-CD complex |                      | Luotonin A/HPβ-CD complex |                      |
|----------|-------------------------|----------------------|---------------------------|----------------------|
|          | Δδ (absolute, ppm),     | Δδ (normalized, ppm) | Δδ (absolute, ppm)        | Δδ (normalized, ppm) |
| H-1      | 0.004                   | 1.0                  | 0.004                     | 1.0                  |
| H-2      | 0.003                   | 0.750                | 0.003                     | 0.750                |
| H-3      | 0.003                   | 0.750                | 0.003                     | 0.750                |
| H-4      | 0.003                   | 0.750                | 0.003                     | 0.750                |
| H-5      | --                      | --                   | --                        | --                   |
| H-6      | --                      | --                   | --                        | --                   |
| H-7      | 0.003                   | 0.750                | 0.003                     | 0.750                |
| H-8      | 0.003                   | 0.750                | 0.003                     | 0.750                |
| H-9      | 0.003                   | 0.750                | 0.003                     | 0.750                |
| H-10     | 0.004                   | 1.0                  | 0.004                     | 1.0                  |
| H-11     | --                      | --                   | --                        | --                   |
| H-12     | --                      | --                   | --                        | --                   |
| H-13     | 0.004                   | 1.0                  | 0.004                     | 1.0                  |
| H-14     | 0.004                   | 1.0                  | 0.004                     | 1.0                  |

**Table S4.** Linear regression parameters obtained for the calibration curves of CPT and employing luotonin A as inner standard. The solutions of CPT and luotonin A were prepared in a 40:60; v:v mixture of acetonitrile : buffered aqueous solution 0.15 M (ammonium acetate/acetic acid) to obtain the desired pH value.

| pH  | Linear range studied                            | R <sup>2</sup> | Ordinate | Slope             |
|-----|-------------------------------------------------|----------------|----------|-------------------|
| 3.0 | $5.0 \times 10^{-10}$ to $1.0 \times 10^{-8}$ M | 0.9865         | 0.61     | $1.0 \times 10^9$ |
| 6.0 | $5.0 \times 10^{-10}$ to $1.0 \times 10^{-8}$ M | 0.9923         | 0.25     | $2.0 \times 10^9$ |
| 8.0 | $5.0 \times 10^{-10}$ to $1.0 \times 10^{-8}$ M | 0.9833         | 1.95     | $9.0 \times 10^8$ |

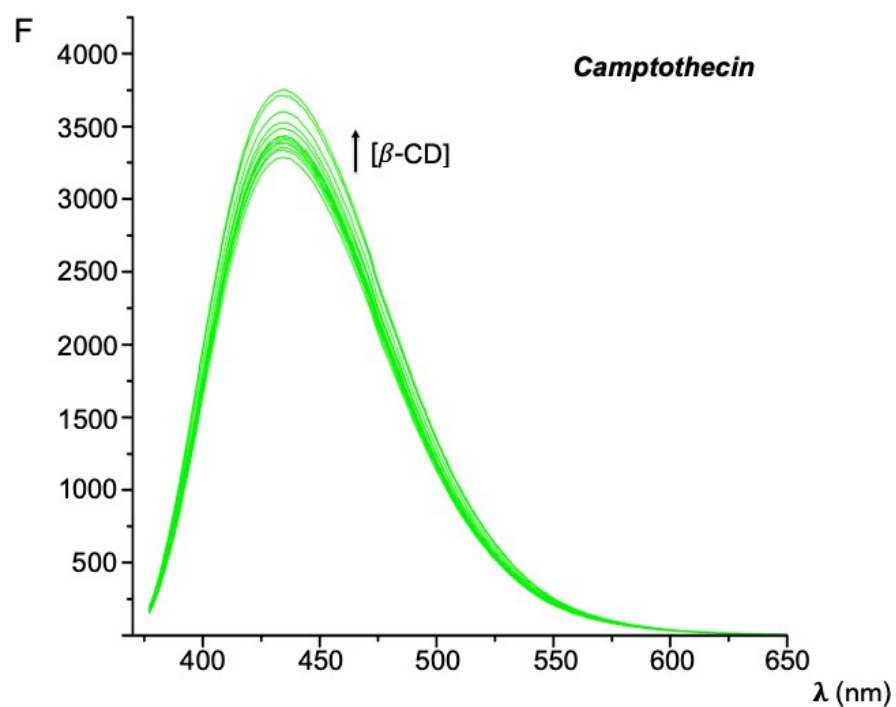

**Figure S1.** Fluorescence emission spectra of camptothecin in the presence of increasing concentrations of  $\beta$ -CD in aqueous solution at pH 5.5.

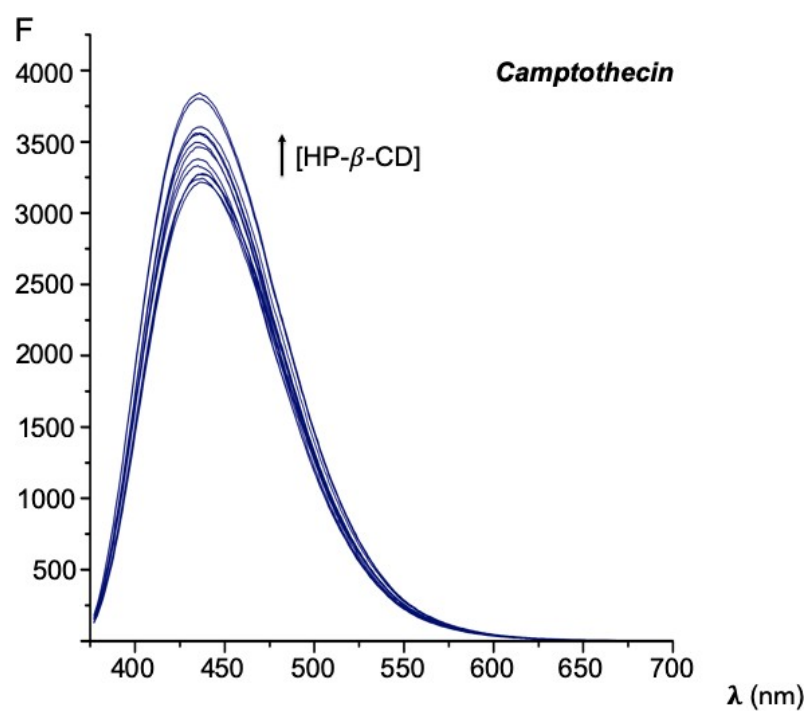

**Figure S2.** Fluorescence emission spectra of camptothecin in the presence of increasing concentrations of HP- $\beta$ -CD in aqueous solution at pH 5.5.

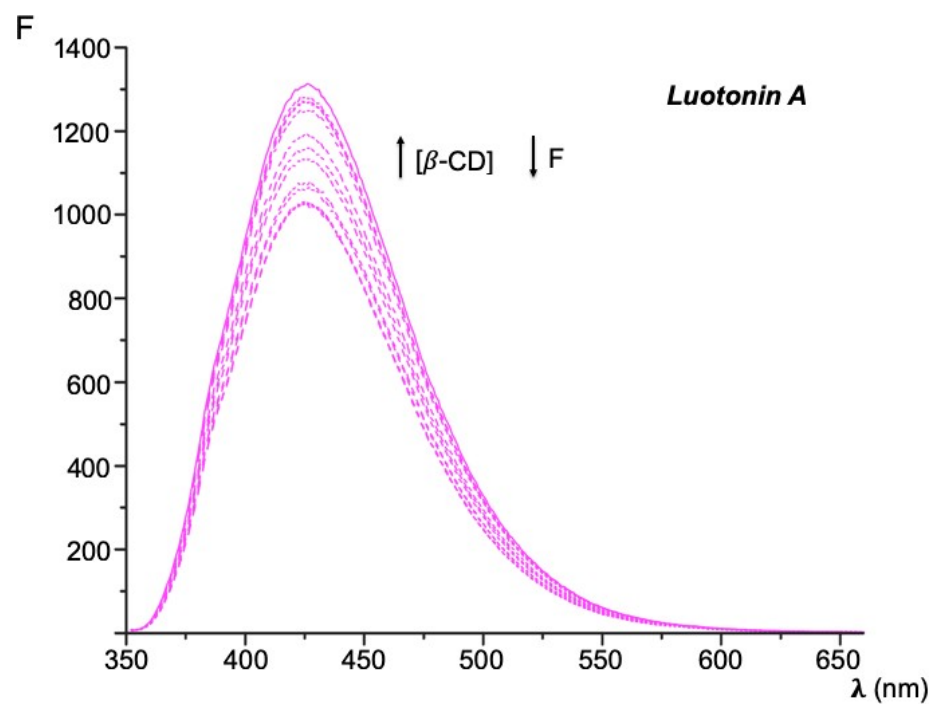

**Figure S3.** Fluorescence emission spectra of luotonin A in the presence of increasing concentrations of  $\beta$ -CD in aqueous solution at pH 5.5.

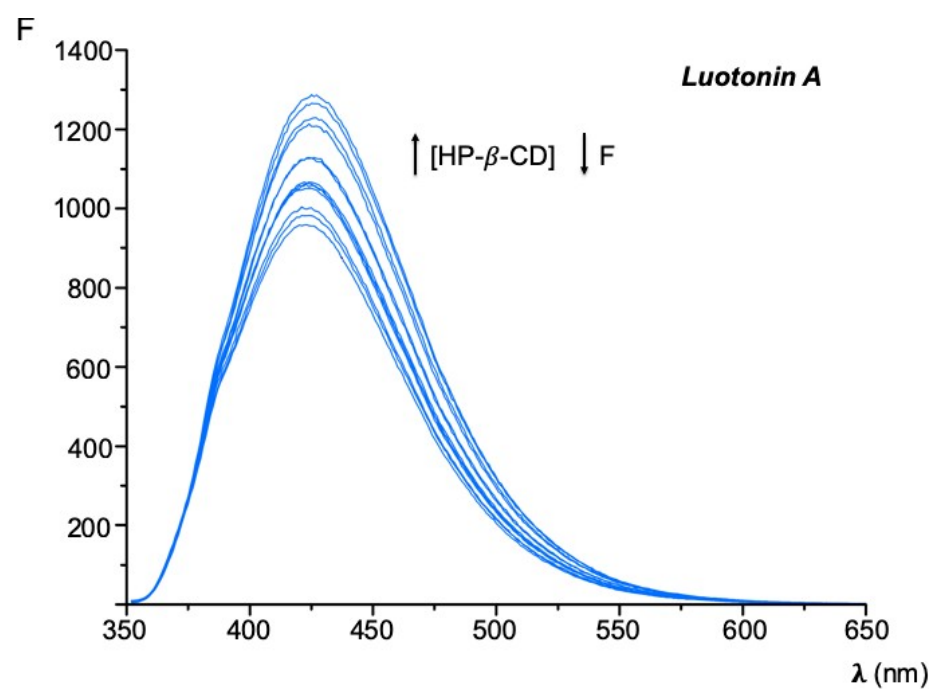

**Figure S4.** Fluorescence emission spectra of luotonin A in the presence of increasing concentrations of HP- $\beta$ -CD in aqueous solution at pH 5.5.

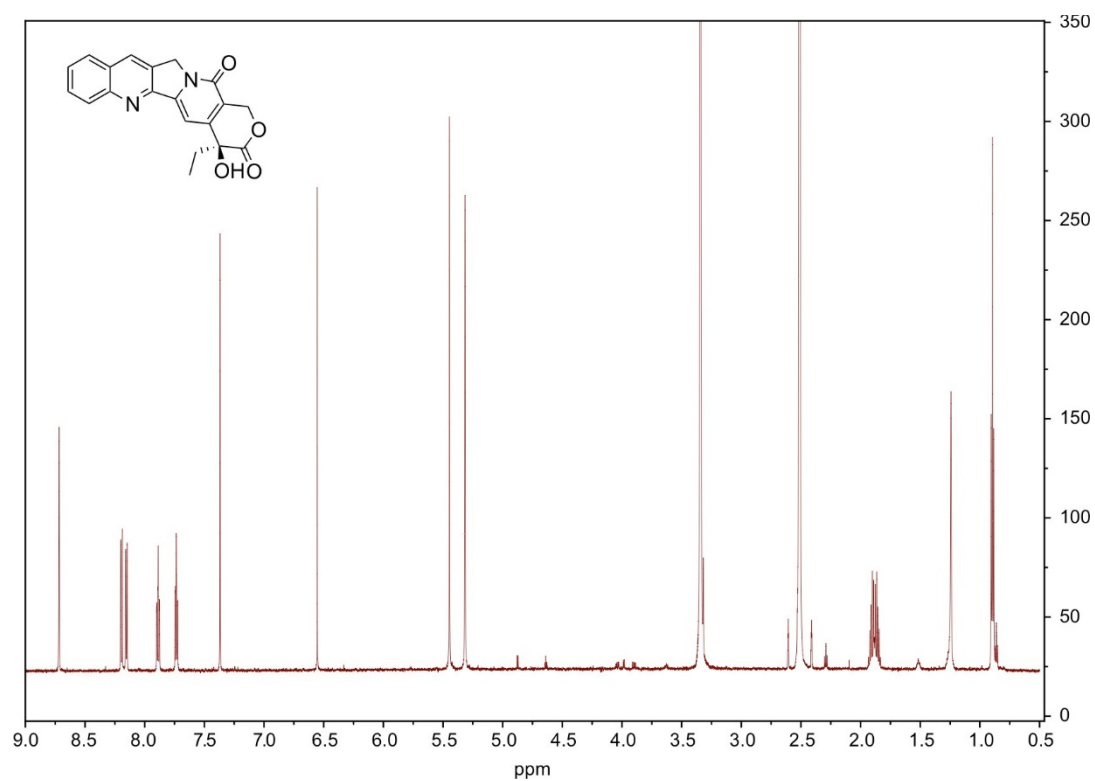

**Figure S5.**  $^1\text{H}$ -NMR spectrum of camptothecin (700 MHz,  $\text{d}_6$ -DMSO).

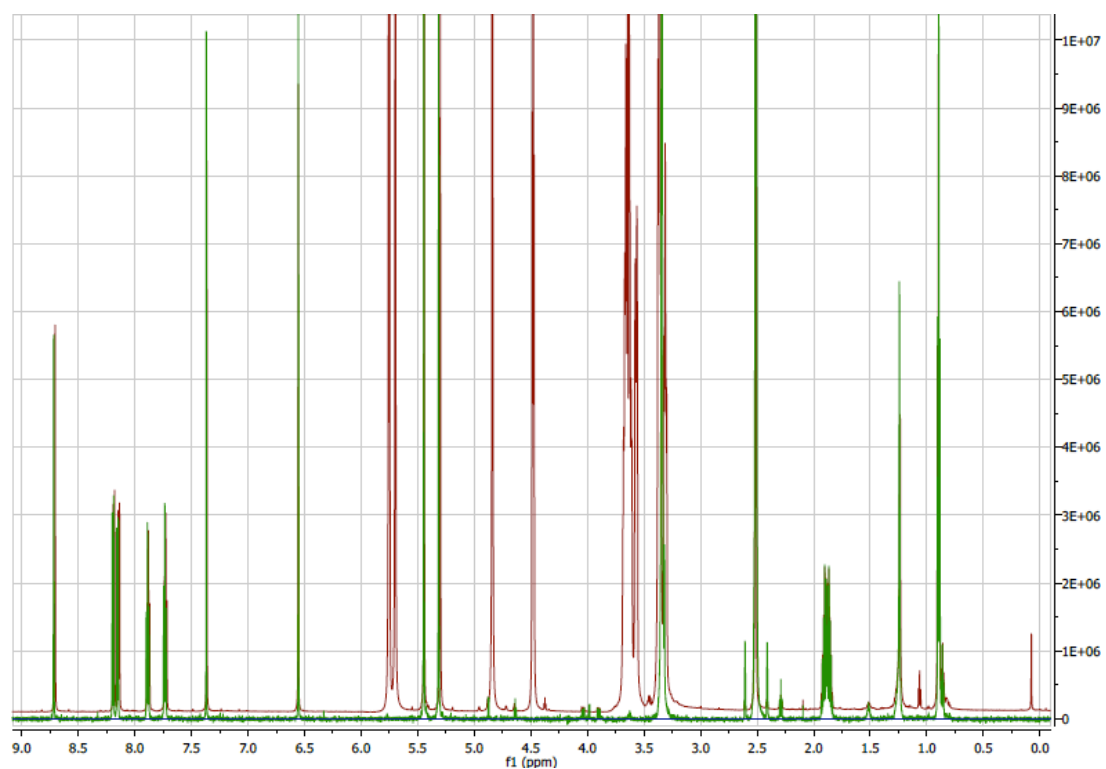

**Figure S6.** Overlapped  $^1\text{H}$ -NMR spectra of camptothecin (green) and its  $\beta$ -CD complex (red) (700 MHz,  $\text{d}_6$ -DMSO).

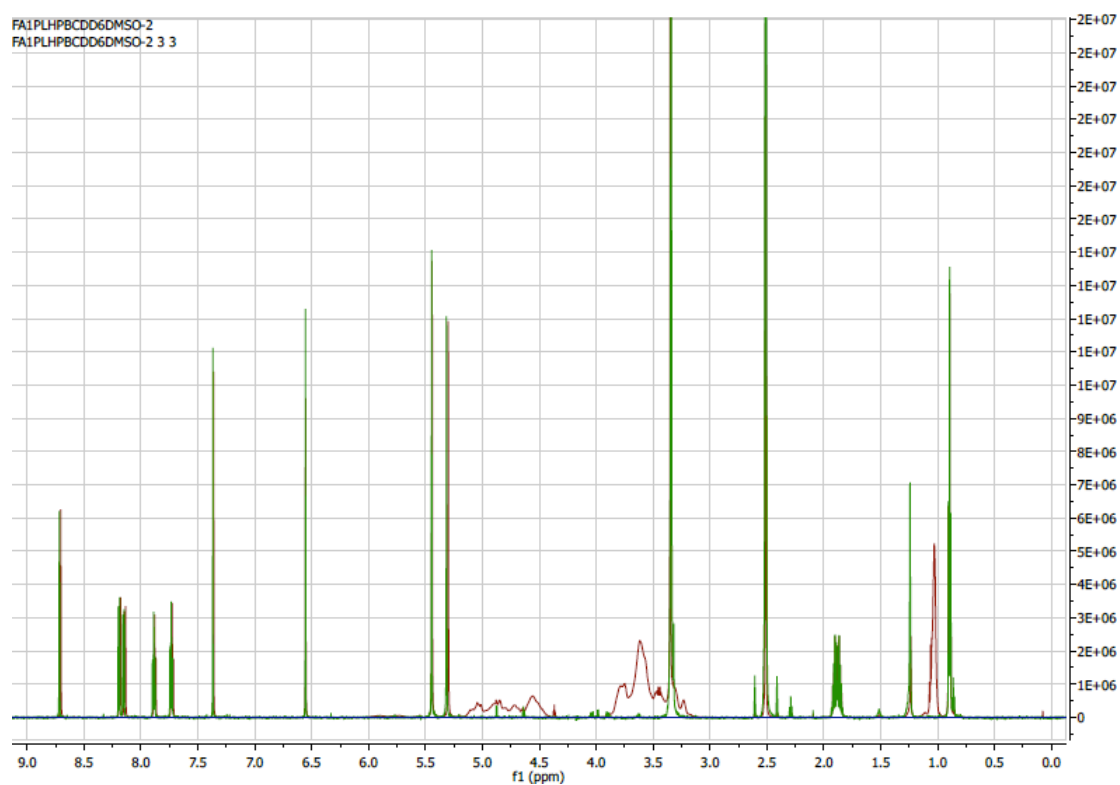

**Figure S7.** Overlapped  $^1\text{H}$ -NMR spectra of camptothecin (green) and its HP- $\beta$ -CD complex (red) (700 MHz,  $d_6$ -DMSO).

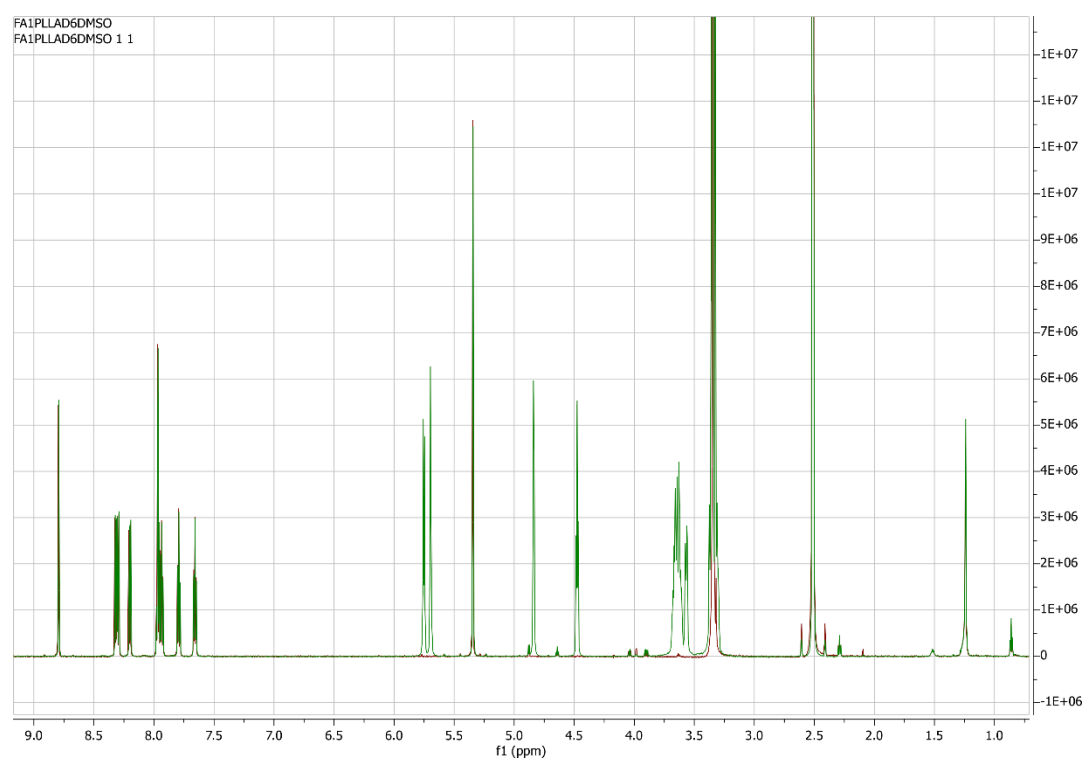

**Figure S8.** Overlapped  $^1\text{H}$ -NMR spectra of luotonin A (red) and its  $\beta$ -CD complex (green) (700 MHz,  $d_6$ -DMSO).

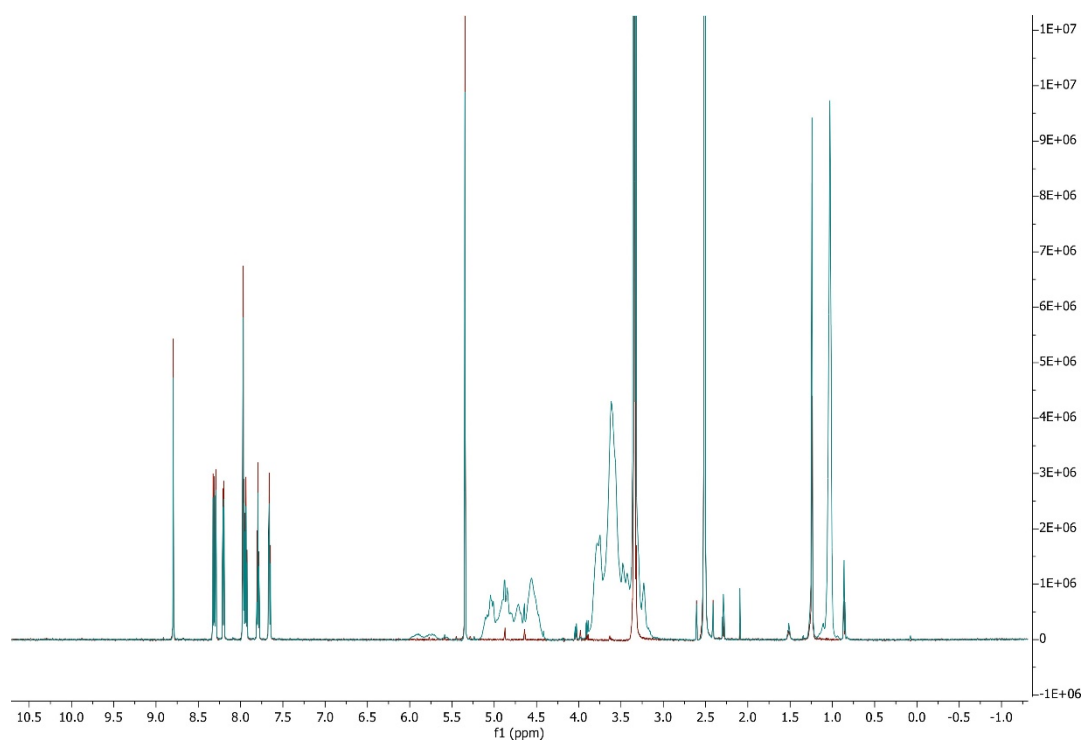

**Figure S9.** Overlapped <sup>1</sup>H-NMR spectra of luotonin A (red) and its HP-β-CD complex (green) (700 MHz, d<sub>6</sub>-DMSO).



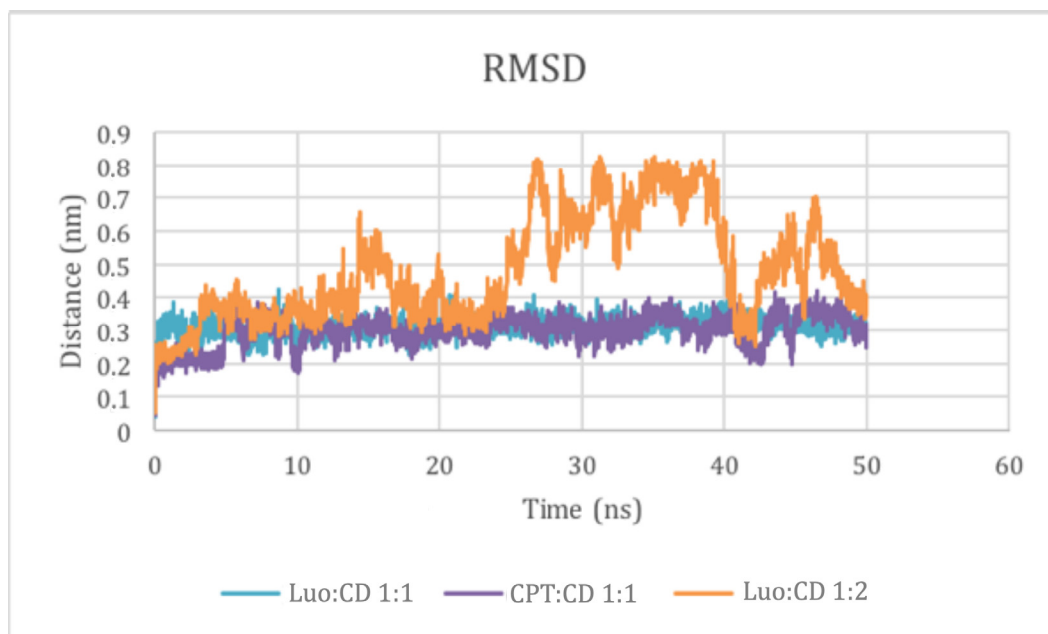

**Figure S10.** RMSD values for the camptothecin- $\beta$ -CD 1:1 complex (purple), the luotonin- $\beta$ -CD 1:1 complex (blue) and the luotonin- $\beta$ -CD 1:2 complex (orange).
